# Supplementary material for: A membrane-associated phosphoswitch in Rad controls adrenergic regulation of cardiac calcium channels
Source: PubMed Central journal article supplement (PMC10904049; doi:10.1172/jci176943), 2024-01-16

Uncropped gels  
Supplemental Figure 3A

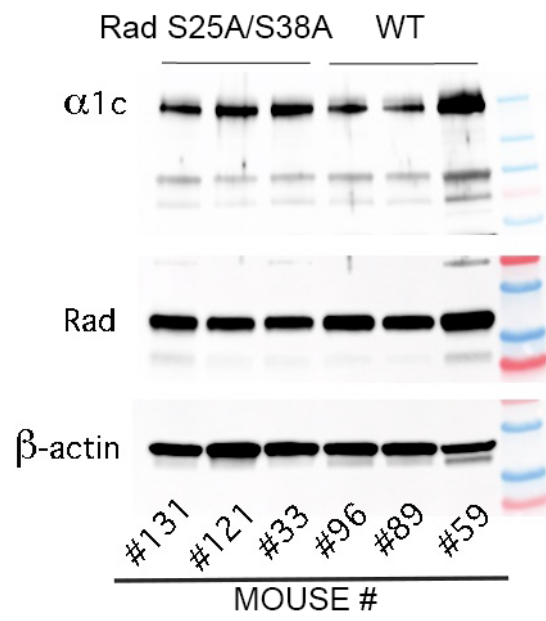

Supplement: jci-134-176943-s037.pdf [file jci-134-176943-s037.pdf]
